# Supplementary material
Source: publisher figshare collection journal article supplement (https://gsapubs.figshare.com/ndownloader/files/26885636)
Supplement: Supplementary file 1 [file 26885636]

Yuan-Yuan Jiang, Ze-Ming Zhang, Richard M. Palin, Hui-Xia Ding, and Xuan-Xue Mo, 2021, Early Cenozoic partial melting of meta-sedimentary rocks of the eastern Gangdese arc, southern Tibet, and its contribution to syn-collisional magmatism: GSA Bulletin, <https://doi.org/10.1130/B35763.1>.

## Supplemental Material

**Table S1.** Representative chemical compositions (wt%) of garnet from the paragneisses.

**Table S2.** Representative chemical compositions (wt%) of biotite from the studied paragneisses.

**Table S3.** Representative chemical compositions (wt%) of plagioclase from the paragneisses.

**Table S4.** Zircon U–Pb dating and trace element data of the paragneisses and leucosome.

**Table S5.** Monazite U–Th–Pb dating and trace element data of the paragneisses and leucosome.

**Table S6.** Zircon Lu–Hf isotope data of the paragneisses and leucosome.
